# Supplementary material for: High Phenotypic Diversity Does Not Always Hide Taxonomic Diversity: A Study Case with Cheilosia soror (Zetterstedt, 1843) (Diptera: Syrphidae) in the Iberian Peninsula
Source: Hindawi journal article supplement (doi:10.1155/2022/8378483), 2022-12-17
Supplement: f1 [file 8378483.f1.docx]

**Supplementary material 1:** List of examined material for each species of the *C. longula* group in the Iberian Peninsula

***Cheilosia longula*** (Zetterstedt, 1838)

***Examined material. New.*** **Spain**. 1♀, La Pobla de Benifassà (Castellón, 40°39’23’’N 00°09’27’’E, 755 m asl), T.Ma. 26/IX/ - 3/X/2005, , R. Gil Leg.; 3♂♂, Valle de Estós (Huesca), 14/VIII/1991, Mª A. Marcos-García Leg.; Font Roja (Alcoy, Alicante), 3/VIII/1992, 1♀, P. M. Isidro Leg.; Pluvigner (Morbihan, France), 19/IX/1910, 1♂, unknown Leg., MNCN; 1♂, 1204, Slovenija Savica, 14/VI/1988, A. Vujić Leg., FSUNS.

***Published.* Spain.**4♂♂, Plan de Sarra (Valle de Benasque, Huesca, 1750 m asl), 26/VII/1983, Mª A. Marcos-García Leg. (Marcos-García, 1985);1♂, Ribera de Tregurà (Vilallonga de Ter, Gerona, 1157 m), 31/VII/2020, A. Ricarte and Z. Nedeljković Leg. (Ricarte et al*.* 2021)

***Cheilosia scutellata*** (Fallén, 1817)

***Examined material. New.*** **Spain**. 1♂, Font Roja (Alcoy, Alicante), 14/VI/1994, C. Pérez-Bañón and P. M. Isidro Leg.; 1♂, Font Roja (Alcoy, Alicante), 2/IX/1991, M. A. Marcos-García Leg.; 1♂, Font Roja (Alcoy, Alicante), 11/IX/1991, M. A. Marcos-García Leg.; 3♂♂, Font Roja (Alcoy, Alicante), 9/IX/1992, P. M. Isidro Leg.; 1♂ Font Roja (Alcoy, Alicante), 9/IX/1993, P. M. Isidro Leg.; 10♂♂, Font Roja (Alcoy, Alicante), 15/IX/1993, P. M. Isidro Leg.; 2♂♂, Font Roja (Alcoy, Alicante), 26/IX/1994, P. M. Isidro Leg.; 22♂♂ and 4♀♀, Requena (Valencia), 5/IX/1993, C. Pérez-Bañón Leg.; 3♀♀, Requena (Valencia), 30/IX/1993, C. Pérez-Bañón Leg.; 1♂ and 15♀♀, Utiel (Valencia), 30/IX/1993, C. Pérez-Bañón Leg.; 1♀, Utiel (Valencia), 6/X/1993 , C. Pérez-Bañón Leg.; 1♀, Utiel (Valencia), 17/X/1993, C. Pérez-Bañón Leg.; 1♀, Font Retura (Agres, Alicante, 900 m), T.Ma. 10/IX - 24/IX/2002, C. Pérez-Bañón, M. A. Marcos-García and S. Rojo Leg.; 1♂, Chelva (Valencia), 28/VIII/1993, C. Pérez-Bañón Leg.; 1♀, Venta de la Carrasqueta (Jijona, Alicante, 980 m), T.Ma. 24/IX - 7/X/2002, C. Pérez-Bañón, M. A. Marcos-García and S. Rojo Leg.; 1♂ and 1♀, Dale Ry: Hetland (Norway), 27/VII/1970, T. Nielsen Leg.; 1♂ and 1♀, La Honfría (Salamanca, 975 m), 12/VIII/1985, M. A. Marcos-García Leg.; 2♂♂ and 1♀, Linares de Riofrío (Salamanca), 13/VI/1979, M. A. Marcos-García Leg.; 1♀, La Pobla de Benifassà (Castellón, 40°39’23’’N 00°09’27’’E, 755 m), T.Ma. 26/IX - 03/X/2005, R. Gil Leg.; 4♂♂, Font del Mas dels Arbres (Sierra de Mariola, Bocairent, Valencia), 03/VI/2020, A. Ricarte Leg.; 1♀, Font del Mas dels Arbres (Sierra de Mariola, Bocairent, Valencia), 29/V/2021, I. Ballester-Torres Leg.; 2♂♂, Puerto de Tudons, Sierra de Aitana (Alcoleja, Alicante), 06/VI/2020, A. Ricarte and Z. Nedeljković Leg.; 1♀, Puerto de Tudons, Sierra de Aitana (Alcoleja, Alicante), 18/VI/2020, A. Ricarte and Z. Nedeljković Leg.; 4♂♂ and 4♀♀, Puerto de Tudons, Sierra de Aitana (Alcoleja, Alicante), 01/X/2020, A. Ricarte and Z. Nedeljković Leg.; 1♂, Covadonga (Asturias), IIV 928, J. Dusmet Leg., MNCN; 1♂ and 1♀, Llanars, Ruta Llanars-Camprodon (Girona), 29/VII/2020, A. Ricarte Leg.; 1♂, Llanars, orillas de la Riera de Feitús desde Font del Tir (Girona), 29/VII/2020, A. Ricarte Leg.; 1♀, Setcases, camino del depósito de agua (Girona, 1317m), 30/VII/2020, Z. Nedeljković Leg.; 1♀, Pla d’Aparici (Bocairent, Valencia), 3/VI/2020, A. Ricarte Leg.; 1♀, Mas del Piscul, Sierra de Aitana (Alcoleja, Alicante), 29/V/2021, Z. Nedeljković and I. Ballester-Torres Leg.; 2♂♂ and 2♀♀, Mas del Piscul, Sierra de Aitana (Alcoleja, Alicante), 11/VI/2021, Z. Nedeljković and I. Ballester-Torres Leg.; 1♀, Ruta Desfiladero de las Xanas (Concejo Santo Adriano, Asturias), 21/VIII/2021, P. Aguado-Aranda Leg.; 1♂, Santa Marina (Posada de Valdeón, León, 43º7’57.5’’N 4º53’19.9’’O), 24/VIII/2021, Z. Nedeljković and A. Ricarte Leg.; 2♀♀, Sta. Marina-Prada (Posada de Valdeón, León, 43º8’44.7’’N 4º53’28.7’’O), 24/VIII/2021, Z. Nedeljković and A. Ricarte Leg.; 4♂♂, Prada, bordes ctra. (Posada de Valdeón, León, 43º8’44.7’’N 4º54’35.4’’O), 25/VIII/2021, Z. Nedeljković and A. Ricarte Leg.; 2♂♂ and 1♀, Cordiñanes, Ermita de Corona (Posada de Valdeón, León, 43º10’60’’N 4º54’9.4’’O), 26/VIII/2021, Z. Nedeljković and A. Ricarte Leg.; 2♂♂ and 1♀, Cordiñanes, campo de *Daucus* (Posada de Valdeón, León, 43º10’6.5’’N 4º54’14.8’’O), 26/VIII/2021, Z. Nedeljković and A. Ricarte Leg.;2♂♂ and 2♀♀, Los Llanos (Posada de Valdeón, León, 43º9’23.6’’N 4º54’59’’O), 27/VIII/2021, Z. Nedeljković and A. Ricarte Leg.; 2♂♂, Campo de *Daucus* (Posada de Valdeón, León, 43º9’6.9’’N 4º54’58.8’’O), 25/VIII/2021, Z. Nedeljković and A. Ricarte Leg.; 5♂♂ and 3♀♀, Campo de *Daucus* (Posada de Valdeón, León, 43º9’6.9’’N 4º54’58.8’’O), 27/VIII/2021, Z. Nedeljković and A. Ricarte Leg.; 1♂, Campo de *Daucus* (Posada de Valdeón, León, 43º9’6.9’’N 4º54’58.8’’O), 28/VIII/2021, Z. Nedeljković and A. Ricarte Leg.; 1♂, Sevares (Concejo Piloña, Asturias), 28/VIII/2021, P. Aguado-Aranda Leg.; 1♂ and 3♀♀, Bajo Viaducto Río Andarax (Fondón, Almería, 36º59’13’’N 2º50’39’’W), 4/X/2021, I. Ballester-Torres Leg.; 4♀♀, Bajo Viaducto Río Andarax (Fondón, Almería, 36º59’13’’N 2º50’39’’W), 5/X/2021, I. Ballester-Torres Leg.; ***Published.* Spain*.*** 2♂♂ and 19♀♀, Parador de Peña Oroel (Huesca), 21/VII/1983, M. A. Marcos-García Leg. (Marcos-García, 1985); 1♀, Desfiladero de las Conjas (Príoro, León), 14/VII/1987, M. A. Marcos-García Leg. (Marcos-García, 1990a, b); 1♂ and 1♀, Font Roja (Alcoy, Alicante), 27/VII/1993, P. M. Isidro Leg. (Isidro, 1995); 1♂, Font Roja (Alcoy, Alicante), 30/VIII/1993, P. M. Isidro Leg. (Isidro, 1995); 1♂, Font Roja (Alcoy, Alicante), 21/IX/1993, P. M. Isidro Leg. (Isidro, 1995); 1♂ and 1♀, Zafra (Badajoz, 650 m), 21/V/1982, M. A. Marcos-García Leg. (Marcos-García, 1986b); 1♀, Linares de Riofrío (Salamanca), 17/VI/1980, M. A. Marcos-García Leg. (Marcos-García, 1986a); 1♂, El Cabaco (Salamanca), 6/VII/1977, M. A. Marcos-García Leg. (Marcos-García, 1986a); 1♂, Los Narros (Ávila), 26/VI/1980, M. A. Marcos-García Leg. (Marcos-García, 1986a); 1♂ and 1♀, La Honfría (Salamanca, 1050 m), 10/VIII/1980, M. A. Marcos-García Leg. (Marcos-García, 1986a); 1♂, Beberinos (León), 11/IX/1987, M. A. Marcos-García Leg. (Marcos-García, 1990a, b); 1♀, Batuecas (Salamanca, 500 m), 29/IX/1980, M. A. Marcos-García Leg. (Marcos-García, 1986a); 1♀, Villanova (Valle de Benasque, Huesca), 26/VII/1983, M. A. Marcos-García Leg. (Marcos-García, 1985); 1♀, Siresa (Huesca), 20/VII/1983, M. A. Marcos-García Leg. (Marcos-García, 1985); **Morocco**. 5♂♂ and 2♀, Tanger, M. Escalera Leg., MNCN (Gil Collado, 1929). **Bosnia** **and** **Herzegovina**. 1♂, Olovo-Liv, 28/VI/1975, A. Vujić Leg., FSUNS; **Serbia**. 1♀, 1401, Zlot, Zlotska Klisura, 29/IV/1989, A. Vujić Leg., FSUNS.

***Cheilosia soror***(Zetterstedt, 1843)

***Examined material. New.* Spain.**1♂, La Honfría (Salamanca, 975 m), 12/VIII/1981, M. A. Marcos-García Leg.; 1♂, Font Retura (Agres, Alicante, 900 m), T.Ma. 16 - 30/VII/2002, C. Pérez-Bañón, M. A. Marcos-García and S. Rojo Leg.; 2♂, Foia Ampla (Agres, Alicante, 1060 m), T.Ma. 23/IV - 15/V/2002, C. Pérez-Bañón, M. A. Marcos-García and S. Rojo Leg.; 3♀♀, Venta de la Carrasqueta (Jijona, Alicante, 980 m), T.Ma. 4 - 17/VI/2002, C. Pérez-Bañón, M. A. Marcos-García and S. Rojo Leg.; 1♀, Venta de la Carrasqueta (Jijona, Alicante, 980 m), T.Ma. 17/VI - 2/VII/2002, C. Pérez-Bañón, M. A. Marcos-García and S. Rojo Leg.; 2♂, Venta de la Carrasqueta (Jijona, Alicante, 980 m), T.Ma. 10 - 24/IX/2002, C. Pérez-Bañón, M. A. Marcos-García and S. Rojo Leg.; 1♂, Venta de la Carrasqueta (Jijona, Alicante, 980 m), T.Ma. 24/IX - 7/X/2002, C. Pérez-Bañón, M. A. Marcos-García and S. Rojo Leg.; 1♂, Mas del Cano (Xixona, Alicante, 940 m), T.Ma. 15/V - 4/VI/2002, C. Pérez-Bañón, M. A. Marcos-García and S. Rojo Leg.; 1♀, Albarracín (Teruel), VII/1904, Dusmet Leg.; 1♂ and 3♀♀, Font Roja (Alcoy, Alicante), 18/VII/1992, P. M. Isidro Leg.; 3♂♂ and 5♀♀, Font Roja (Alcoy, Alicante), 3/VIII/1992, P. M. Isidro Leg.; 2♂♂ and 1♀, Font Roja (Alcoy, Alicante), 4/VIII/1992, P. M. Isidro Leg.; 1♀, Font Roja (Alcoy, Alicante), 13/VII/1993, P. M. Isidro Leg.; 1♂, Font Roja (Alcoy, Alicante), 15/VII/1993, P. M. Isidro Leg.; 2♂♂ and 5♀♀, Font Roja (Alcoy, Alicante), 28/VII/1993, P. M. Isidro Leg.; 1♂, Font Roja (Alcoy, Alicante), 28/VIII/1993, P. M. Isidro Leg.; 2♂♂ and 1♀, Font Roja (Alcoy, Alicante), 29/V/1994, P. M. Isidro Leg.; 1♂, Font Roja (Alcoy, Alicante), 31/V/1994, P. M. Isidro Leg.; 2♀♀, Font Roja (Alcoy, Alicante), 17/VI/1994, P. M. Isidro Leg.; 2♂♂ and 1♀, Font Roja (Alcoy, Alicante), 27/VI/1994, L. Sonet Leg.; 2♀♀, Requena (Valencia), 5/IX/1993, C. Pérez-Bañón Leg.; 1♀, Chelva (Valencia), 30/IX/1993, C. Pérez-Bañón Leg.; 1♀, Utiel (Valencia), 30/IX/1993, C. Pérez-Bañón Leg.; 24♂♂ and 12♀♀, Puerto de Tudons, Sierra de Aitana (Alcoleja, Alicante), 29/V/2020, M. A. Marcos-García, A. Ricarte and Z. Nedeljković Leg.; 10♂♂ and 8♀♀, Puerto de Tudons, Sierra de Aitana (Alcoleja, Alicante), 06/VI/2020, M. A. Marcos-García, A. Ricarte and Z. Nedeljković Leg.; 9♂♂ and 5♀♀, Puerto de Tudons, Sierra de Aitana (Alcoleja, Alicante), 18/VI/2020, M. A. Marcos-García, A. Ricarte and Z. Nedeljković Leg.; 1♂ and 1♀, Puerto de Tudons, Sierra de Aitana (Alcoleja, Alicante), 20/VI/2020, M. A. Marcos-García, A. Ricarte and Z. Nedeljković Leg.; 3♀♀, Puerto de Tudons, Sierra de Aitana (Alcoleja, Alicante), 1/X/2020, M. A. Marcos-García, A. Ricarte and Z. Nedeljković Leg.; 1**♂,** Puerto de Tudons, Sierra de Aitana (Alcoleja, Alicante), 26/V/2021, M. A. Marcos-García, A. Ricarte and Z. Nedeljković Leg.; 12♂♂ and 9♀♀, Mas del Piscul, Sierra de Aitana (Alcoleja, Alicante), 29/V/2019, M. A. Marcos-García, A. Ricarte and Z. Nedeljković Leg.; 13♂♂ and 4♀♀, Font del Mas dels Arbres, Sierra de Mariola (Bocairent, Valencia), 3/VI/2020, A. Ricarte and Z. Nedeljković Leg.; 16♂♂ and 5♀♀, Font del Mas dels Arbres, Sierra de Mariola (Bocairent, Valencia), 29/V/2021, I. Ballester-Torres Leg.; 1♀, La Pobla de Benifassà (Castellón, 40°39’23’’N 00°09’27’’E, 755 m), T.Ma. 7 - 14/X/2004, R. Gil Leg.; 1♀, La Pobla de Benifassà (Castellón, 40°39’23’’N 00°09’27’’E, 755 m), T.Ma. 6 - 13/VI/2005, R. Gil Leg.; 3♀♀, La Pobla de Benifassà (Castellón, 40°39’23’’N 00°09’27’’E, 755 m), T.Ma. 13 - 20/VI/2005, R. Gil Leg.; 2♀♀, La Pobla de Benifassà (Castellón, 40°39’23’’N 00°09’27’’E, 755 m), T.Ma. 20 - 27/VI/2005, R. Gil Leg.; 2♀♀, La Pobla de Benifassà (Castellón, 40°39’23’’N 00°09’27’’E, 755 m), T.Ma. 11 - 18/VII/2005, R. Gil Leg.; 1♀, La Pobla de Benifassà (Castellón, 40°39’23’’N 00°09’27’’E, 755 m), T.Ma. 18 - 28/VII/2005, R. Gil Leg.; 1♀, La Pobla de Benifassà (Castellón, 40°39’23’’N 00°09’27’’E, 755 m), T.Ma. 4 - 11/VIII/2005, R. Gil Leg.; 2♂♂, La Pobla de Benifassà (Castellón, 40°39’23’’N 00°09’27’’E, 755 m), T.Ma. 8/VIII - 2/IX/2005, R. Gil Leg.; 1♂, La Pobla de Benifassà (Castellón, 40°39’23’’N 00°09’27’’E, 755 m), T.Ma. 19 - 26/IX/2005, R. Gil Leg.; 1♀, La Pobla de Benifassà (Castellón, 40°39’23’’N 00°09’27’’E, 755 m), T.Ma. 26/VI - 3/VII/2006, R. Gil Leg.; 1♂, La Pobla de Benifassà (Castellón, 40°39’23’’N 00°09’27’’E, 755 m), T.Ma. 16 - 23/VII/2007, R. Gil Leg.; 1♂, La Pobla de Benifassà (Castellón, 40°39’23’’N 00°09’27’’E, 755 m), T.Ma. 10 - 17/IX/2007, R. Gil Leg.; 2♂ and 3♀♀, Frías (Teruel), 7/VII/1997, M. A. Marcos-García Leg.; 1♂ and 1♀, Griegos (Teruel), 8/VII/1997, M. A. Marcos-García Leg.; 2♂ and 5♀, Royuela (Albarracín, Teruel), 9/VII/1997, M. A. Marcos-García Leg.; 4♂♂ and 1♀, Font Roja (Alcoy, Alicante), 2/VII/1994, S. Rojo Leg.; 2♂♂ and 2♀♀, Los Romerales (Villalba de la Sierra, Cuenca), 5/VII/1997, M. A. Marcos-García Leg.; 1♂ and 1♀, Jardín Botánico de Torretes (Ibi, Alicante), 10/V/2006, M. A. Marcos-García Leg.; 1♂, Puerto del Cubillo (Teruel, 1550 m), 6/VII/1997, M. A. Marcos-García Leg.; 1♀, Bronchales (Teruel, 1700m), 8/VII/1997, M. A. Marcos-García Leg.; 1♀, Altarejos (Cuenca), 4/VII/1997, M. A. Marcos-García Leg.; 1♂, Alcoy (Alicante), 20/VI/1991, M. A. Marcos-García Leg.; 2♂♂, Venta del Collao (La Vall de Laguar, Alicante, 38º46’10,91’’N 0º9’4,21’’O, 762 m), 23/VI/2020, A. Ricarte and Z. Nedeljković Leg.; 2**♂♂,** Venta del Collao (La Vall de Laguar, Alicante, 38º46’10,91’’N 0º9’4,21’’O, 762 m), 26/V/2021, A. Ricarte and Z. Nedeljković Leg.; 1♂, Pla d’Aparici (Bocairent, Valencia), 3/VI/2020, A. Ricarte Leg.; 1♀, La Balma, Río Bergantes (Castellón), 24/V/1998, Unknown Leg.; 1♂, Ascenso Font Roja (Alcoy, Alicante), 1/IV/2021, Ricarte and Aguado-Aranda Leg.; 1♂, Viladrau (Girona), 14/VI/2009, E. Micó Leg.; 1♀, Font de la Coveta (Bocairent, Valencia, 770 m), 22/VII/2021, I. Ballester-Torres Leg.; 1♂, Ruta Desfiladero de Las Xanas (Concejo Santo Adriano, Asturias), 21/VIII/2021, P. Aguado-Aranda Leg.; 1♂, Cerca Hotel Cumbres (Posada de Valdeón, León, 43º9’3’’N 4º55’9’’O), 23/VIII/2021, Z. Nedeljković and A. Ricarte Leg.; 1♂, Sta. Marina-Prada (Posada de Valdeón, León, 43º8’44.7’’N 4º53’28.7’’O), 24/VIII/2021, Z. Nedeljković and A. Ricarte Leg.; 1♂, Prada, bordes ctra. (Posada de Valdeón, León, 43º8’44.7’’N 4º54’35.4’’O), 25/VIII/2021, Z. Nedeljković and A. Ricarte Leg.; 1♀, Campo de *Daucus* (Posada de Valdeón, León, 43º9’6.9’’N 4º54’58.8’’O), 25/VIII/2021, Z. Nedeljković and A. Ricarte Leg.; 1♂ and 1♀, Campo de *Daucus* (Posada de Valdeón, León, 43º9’6.9’’N 4º54’58.8’’O), 27/VIII/2021, Z. Nedeljković and A. Ricarte Leg.; 3♀♀, Cordiñanes, Ermita de Corona (Posada de Valdeón, León, 43º10’60’’N 4º54’9.4’’O), 26/VIII/2021, Z. Nedeljković and A. Ricarte Leg.; 2♂♂ and 1♀, Cordiñanes, campo de *Daucus* (Posada de Valdeón, León, 43º10’6.5’’N 4º54’14.8’’O), 26/VIII/2021, Z. Nedeljković and A. Ricarte Leg.; 1♂ and 7♀♀, Covadonga (Asturias), IIV 928, J. Dusmet Leg., MNCN.;

***Published.* Spain.** 1♂ and 1♀, Lebeña (Santander), 5/VII/1986, Mª A. Marcos-García Leg. (Marcos-García, 1990a, b); 3♀♀, Siresa (Huesca), 20/VII/1983, Mª A. Marcos-García Leg. (Marcos-García, 1985); 1♀, Tielve (Asturias), 10/IX/1988, Mª A. Marcos-García Leg. (Marcos-García, 1990a, b); 1♀, Parador Peña de Oroel (Huesca), 21/VII/1983, Mª A. Marcos-García Leg. (Marcos-García, 1985); 1♂ and 1♀, Font Roja (Alcoy, Alicante), 27/VII/1993, P. M. Isidro Leg. (Isidro, 1995); 6♂♂ and 1♀, Font Roja (Alcoy, Alicante), 17/VIII/1993, P. M. Isidro Leg. (Isidro, 1995); 2♂♂, Font Roja (Alcoy, Alicante), 30/VIII/1993, P. M. Isidro Leg. (Isidro, 1995**)**; 4♂♂, Font Roja (Alcoy, Alicante), 15/IX/1993, P. M. Isidro Leg. (Isidro, 1995); 1♀, Font Roja (Alcoy, Alicante), 21/IX/1993, P. M. Isidro Leg. (Isidro, 1995); 3♂♂ and 1♀, Font Roja (Alcoy, Alicante), 11/VI/1994, P. M. Isidro Leg. (Isidro, 1995); 1♂, Font Roja (Alcoy, Alicante), 19/V/1994, L. Sonet Leg. (Sonet, 1994); 9♂♂ and 9♀♀, Font Roja (Alcoy, Alicante), 17/VI/1994, L. Sonet Leg. (Sonet, 1994); 2♂♂ and 7♀♀, Font Roja (Alcoy, Alicante), 18/VI/1994, L. Sonet Leg. (Sonet, 1994); 1♂ and 4♀♀, Font Roja (Alcoy, Alicante), 22/VI/1994, L. Sonet Leg. (Sonet, 1994); 1 ♂, Panticosa (Huesca), 12/VII/1917, J. Dusmet Leg., MNCN (published as *Cheilosia scutellata* in Gil-Collado, 1930); 1 ♀, Vallvidrera (Barcelona), 10/VIII/1905, Arias Encobet Leg., MNCN (published in Gil-Collado, 1930). **North** **Macedonia.** 1♀, Oteševo, 17/VI/1990, A. Vujić Leg., FSUNS; **Serbia**. 1♀, 921 Kučaj Crnica Kanjon, 21/VII/1986, A. Vujić Leg., FSUNS; 1♂, 1401. Zlot Zlotska Klisura, 29/IV/1989, A. Vujić Leg., FSUNS.
