# Supplementary material for: High Phenotypic Diversity Does Not Always Hide Taxonomic Diversity: A Study Case with Cheilosia soror (Zetterstedt, 1843) (Diptera: Syrphidae) in the Iberian Peninsula
Source: Hindawi journal article supplement (doi:10.1155/2022/8378483), 2022-12-17
Supplement: f2 [file 8378483.f2.docx]

**Supplementary material 2**: GenBank and/or BOLD accession numbers for the gene sequences used in this study. ‘CEUA’ sequences are new.

| DNA vouchers | Species | Locality and date | Marker | GenBank accessions | BOLD accessions |
| --- | --- | --- | --- | --- | --- |
| CEUA_S16 | *Cheilosia soror* | Spain, Sierra de Aitana, 29/V/2020 | COI-5’ | ON097134 | - |
| CEUA_S17 | *Cheilosia soror* | Spain, Sierra de Aitana, 29/V/2020 | COI-5’ | ON097135 | - |
| CEUA_S18 | *Cheilosia soror* | Spain, Sierra de Aitana, 29/V/2020 | COI-5’ | ON097136 | - |
| CEUA_S19 | *Cheilosia soror* | Spain, Sierra de Aitana, 18/VI/2020 | COI-5’ | ON097137 | - |
| CEUA_S19 | *Cheilosia soror* | Spain, Sierra de Aitana, 18/VI/2020 | 28S | ON103351 | - |
| CEUA_S20 | *Cheilosia soror* | Spain, Bocairent, 03/VI/2020 | COI-5’ | ON097138 | - |
| CEUA_S21 | *Cheilosia soror* | Spain, Bocairent, 03/VI/2020 | COI-5’ | ON097139 | - |
| CEUA_S23 | *Cheilosia soror* | Spain, Sierra de Aitana, 18/VI/2020 | COI-5’ | ON097140 | - |
| CEUA_S23 | *Cheilosia soror* | Spain, Sierra de Aitana, 18/VI/2020 | 28S | ON103352 | - |
| CEUA_S24 | *Cheilosia soror* | Spain, Sierra de Aitana, 20/VI/2020 | COI-5’ | ON097141 | - |
| CEUA_S25 | *Cheilosia soror* | Spain, Bocairent, 3/VI/2020 | COI-5’ | ON097142 | - |
| CEUA_S69 | *Cheilosia soror* | Spain, Sierra de Aitana, 11/VI/2021 | COI-5’ | ON097143 | - |
| CEUA_S69 | *Cheilosia soror* | Spain, Sierra de Aitana, 11/VI/2021 | 28S | ON103357 | - |
| CEUA_S110 | *Cheilosia soror* | Spain, Sierra de Aitana, 29/V/2020 | COI-5’ | ON097149 | - |
| CEUA_S110 | *Cheilosia soror* | Spain, Sierra de Aitana, 29/V/2020 | 28S | ON103358 | - |
| CEUA_S111 | *Cheilosia soror* | Spain, Sierra de Aitana, 29/V/2020 | COI-5’ | ON097150 | - |
| CEUA_S111 | *Cheilosia soror* | Spain, Sierra de Aitana, 29/V/2020 | 28S | ON103359 | - |
| CEUA_S112 | *Cheilosia soror* | Spain, Asturias, 21/VIII/2021 | COI-5’ | ON097151 | - |
| CEUA_S112 | *Cheilosia soror* | Spain, Asturias, 21/VIII/2021 | 28S | ON103360 | - |
| CEUA_S114 | *Cheilosia soror* | Spain, Posada de Valdeón, 25/VIII/2021 | COI-5’ | ON097152 | - |
| CEUA_S114 | *Cheilosia soror* | Spain, Posada de Valdeón, 25/VIII/2021 | 28S | ON103362 | - |
| CEUA_S115 | *Cheilosia soror* | Spain, Sierra de Aitana, 18/VI/2020 | COI-5’ | ON097153 | - |
| CEUA_S115 | *Cheilosia soror* | Spain, Sierra de Aitana, 18/VI/2020 | 28S | ON103363 | - |
| CEUA_S118 | *Cheilosia soror* | Spain, Sierra de Aitana, 29/V/2019 | COI-5’ | ON097154 | - |
| CEUA_S119 | *Cheilosia soror* | Spain, Sierra de Aitana, 11/VI/2021 | COI-5’ | ON097155 | - |
| CEUA_S119 | *Cheilosia soror* | Spain, Sierra de Aitana, 11/VI/2021 | 28S | ON103366 | - |
| CEUA_S121 | *Cheilosia soror* | Spain, Bocairent, 29/V/2021 | COI-5’ | ON097156 | - |
| BIOUG16275-D03 | *Cheilosia soror* | Germany, Landskrone, 26/VIII/2013 | COI-5’ | - | GMGMB729-14 |
| BIOUG16618-D06 | *Cheilosia soror* | Germany, Landskrone, 16/IX/2013 | COI-5’ | - | GMGMD1243-14 |
| BIOUG17375-E03 | *Cheilosia soror* | Germany, Landskrone, 15/VII/2014 | COI-5’ | - | GMGMM1112-14 |
| BIOUG17467-E05 | *Cheilosia soror* | Germany, Oberbayern, 29/VII/2014 | COI-5’ | - | GMGMN1560-14 |
| Jeff Skevington Specimen 22751 | *Cheilosia soror* | Serbia, Nova Varoš, 15/VI/2009 | COI-5’ | KR260210 | - |
| CEUA_S27 | *Cheilosia scutellata* | Spain, Sierra de Aitana, 01/X/2020 | COI-5’ | ON097145 | - |
| CEUA_S27 | *Cheilosia scutellata* | Spain, Sierra de Aitana, 01/X/2020 | 28S | ON103354 | - |
| CEUA_S28 | *Cheilosia scutellata* | Spain, Sierra de Aitana, 01/X/2020 | COI-5’ | ON097146 | - |
| CEUA_S28 | *Cheilosia scutellata* | Spain, Sierra de Aitana, 01/X/2020 | 28S | ON103355 | - |
| CEUA_S29 | *Cheilosia scutellata* | Spain, Setcases, 30/VII/2020 | COI-5’ | ON097147 | - |
| CEUA_S30 | *Cheilosia scutellata* | Spain, Llanars, 29/VII/2020 | COI-5’ | ON097148 | - |
| CEUA_S30 | *Cheilosia scutellata* | Spain, Llanars, 29/VII/2020 | 28S | ON103356 | - |
| CEUA_S126 | *Cheilosia scutellata* | Spain, Fondón, 4/X/2021 | COI-5’ | ON097157 | - |
| CEUA_S129 | *Cheilosia scutellata* | Spain, Fondón, 5/X/2021 | COI-5’ | ON097158 | - |
| MZH:Y1960 | *Cheilosia scutellata* | Spain, 14/VI/2014 | COI-5’ | LT707516 | GBDP32309-19 |
| BC-ZSM-DIP-24155-C11 | *Cheilosia scutellata* | Germany, Oytal, 29/VIII/2014 | COI-5’ | - | AMTPD4595-16 |
| lampe00047 | *Cheilosia scutellata* | Finland, Oulu, 1/VII/2010 | COI-5’ | JN269867 | DIFIA047-11 |
| lampe00051 | *Cheilosia scutellata* | Finland, Oulu, 8/VII2010 | COI-5’ | JN269871 | DIFIA051-11 |
| lampe00055 | *Cheilosia scutellata* | Finland, Hailuoto, 17/VII/2010 | COI-5’ | JN269873 | DIFIA055-11 |
| MZH_HP.29 | *Cheilosia scutellata* | Finland, Otava, 1/VII/2010 | COI-5’ | [OK065441](http://www.ncbi.nlm.nih.gov/nuccore/OK065441) | FIDIP029-11 |
| MZH_HP.176 | *Cheilosia scutellata* | Finland, Pajuvaara, 1/VII/2011 | COI-5’ | [OK065507](http://www.ncbi.nlm.nih.gov/nuccore/OK065507) | FIDIP176-11 |
| MZH_HP.399 | *Cheilosia scutellata* | Finland, Tuliharju, 27/VI/2011 | COI-5’ | [OK065504](http://www.ncbi.nlm.nih.gov/nuccore/OK065504) | FIDIP399-11 |
| MZH_HP.786 | *Cheilosia scutellata* | Finland, Maunulanpuisto, 21/VI/2011 | COI-5’ | [MZ609189](http://www.ncbi.nlm.nih.gov/nuccore/MZ609189) | FIDIP992-12 |
| NorSy46 | *Cheilosia scutellata* | Norway, Nettingfelle, 18/VIII/2009 | COI-5’ | - | NORSY046-12 |
| NorSy78 | *Cheilosia scutellata* | Norway, Jomfruland, 19/VIII/2009 | COI-5’ | - | NORSY078-12 |
| NorSy145 | *Cheilosia scutellata* | Norway, Heggenes, 18/VIII/2009 | COI-5’ | - | NORSY145-12 |
| NorSy261 | *Cheilosia scutellata* | Norway, Nettingfelle, 18/VIII/2009 | COI-5’ | - | NORSY261-12 |
| CEUA_S26 | *Cheilosia longula* | Spain, Villalonga de Ter, 31/VII/2020 | COI-5’ | ON097144 | - |
| CEUA_S26 | *Cheilosia longula* | Spain, Villalonga de Ter, 31/VII/2020 | 28S | ON103353 | - |
| BC-ZSM-DIP-24155-G01 | *Cheilosia longula* | Germany, Oytal, 16/VI/2014 | COI-5’ | - | AMTPD4633-16 |
| FiDip21 | *Cheilosia longula* | Norway, Stabbursdalen, 26/VII/2010 | COI-5’ | - | DIPFI021-12 |
| NorSy90 | *Cheilosia longula* | Norway, Jomfruland, 19/VIII/2009 | COI-5’ | - | NORSY090-12 |
| NorSy267 | *Cheilosia longula* | Norway, Heggenes, 29/VII/2009 | COI-5’ | - | NORSY267-12 |
| lampe00054 | *Cheilosia longula* | Finland, Hailuoto, 17/VII/2009 | COI-5’ | [JN269872](http://www.ncbi.nlm.nih.gov/nuccore/JN269872) | DIFIA054-11 |
| MHZ_HP.496 | *Cheilosia longula* | Finland, Kasnaes, 26/VII/2011 | COI-5’ | [MZ626056](http://www.ncbi.nlm.nih.gov/nuccore/MZ626056) | FIDIP496-11 |
| MZH:Y2099 | *Cheilosia longula* | Finland, 19/VIII/2015 | COI-5’ | [LT707514](http://www.ncbi.nlm.nih.gov/nuccore/LT707514) | GBDP32307-19 |
| lampe00032 | *Cheilosia flavissima* | Finland, Hailuoto, 17/VII/2010 | COI-5’ | [JN269864](http://www.ncbi.nlm.nih.gov/nuccore/JN269864) | DIFIA032-11 |
| lampe00033 | *Cheilosia flavissima* | Finland, Oulu, 3/VII/2010 | COI-5’ | [JN269865](http://www.ncbi.nlm.nih.gov/nuccore/JN269865) | DIFIA033-11 |
| MZH_HP.175 | *Cheilosia flavissima* | Finland, Pajuvaara, 1/VII/2011 | COI-5’ | [MZ630567](http://www.ncbi.nlm.nih.gov/nuccore/MZ630567) | FIDIP175-11 |
| MZH_GV.3507 | *Cheilosia flavissima* | Finland, Venunmetsae, 11/VI/2011 | COI-5’ | [OK065557](http://www.ncbi.nlm.nih.gov/nuccore/OK065557) | FIDIP655-12 |
| MZH_HP.581 | *Cheilosia flavissima* | Finland, Lehtovaara, 29/VI/2011 | COI-5’ | [OK065333](http://www.ncbi.nlm.nih.gov/nuccore/OK065333) | FIDIP866-12 |
| MZH_HP.582 | *Cheilosia flavissima* | Finland, Lehtovaara, 29/VI/2011 | COI-5’ | [OK065391](http://www.ncbi.nlm.nih.gov/nuccore/OK065391) | FIDIP867-12 |
| AY261686 | *Ferdinandea cuprea* | N/A | COI-5’ | AY261686 | GBDP1191-06 |
| FSUNS:E1 | *Ferdinandea aurea* | Greece | COI-5’ | MH521927 | GBMNA23941-19 |
| FSUNS:E1 | *Ferdinandea aurea* | Greece | 28S | MH426731 | - |
